# Supplementary material for: Characterisation of 3-methylorcinaldehyde synthase (MOS) in Acremonium strictum: first observation of a reductive release mechanism during polyketide biosynthesis
Source: Royal Society of Chemistry journal article supplement (doi:10.1039/b708614h), 2007-01-01
Supplement: b708614h.pdf [file b708614h.pdf]

# Characterisation of 3-Methylorcinaldehyde Synthase (MOS) in *Acremonium strictum*: First Observation of a Reductive Release Mechanism During Polyketide Biosynthesis.

Andrew M. Bailey,<sup>b</sup> Russell J. Cox,<sup>\*a</sup> Kate Harley,<sup>a</sup> Colin M. Lazarus,<sup>b</sup> Thomas J. Simpson<sup>\*a</sup> and Elizabeth Skellam.<sup>a</sup>

## Electronic Supplementary Information

### 1. Experimental Procedures.

#### 1.1 PCR Primer Sequences.

KHKS2 and KHKS3c degenerate oligonucleotide PCR primers were designed using multiple alignments of non-reducing clade III KS domain sequences obtained from public databases (see section 3 below).

KHKS2 : 5' -GCIGAYGGITAYTGYMGIGG-3'  
KHKS3c : 5' -GTICCI GTICCRTGIGCYTC-3'

Y = T or C; M = A or C; R = A or G; I = inosine.

#### 1.2 gDNA preparation and library construction.

*Acremonium strictum* gDNA was prepared using a method for producing library quality DNA which avoids the use of a caesium chloride density gradient. The resulting gDNA was used to construct a genomic library. The commercially available Lambda phage vector system ( $\lambda$ BlueSTAR; Novagen) was chosen for this purpose. Thus, the prepared genomic DNA was partially digested using *Sau3AI* and ligated into *XhoI* arms supplied with the  $\lambda$ Bluestar kit. The phage library was packaged using the Ready-to-Go Lambda Packaging Kit (Amersham Biosciences) and assayed by plating with KW251 *E. coli* cells. Once successful small-scale ligation and packaging conditions had been achieved, the reactions were scaled up to yield ~10,000 phage clones which were plated out (23 x 23 cm plates). The plaques were visible after incubation (37°C, 16 hours) and transferred to two sequential Zeta-Probe® GT membranes (BioRad).

#### 1.3 PCR Conditions, Library-Probing and Sequencing.

Oligonucleotide-specified sections of DNA were amplified by PCR using Thermoprime Plus DNA polymerase (ABgene®), giving 3'A overhung products such that PCR products can be ligated directly into pGEM-T Easy (Promega) or pCR®2.1-TOPO® (Invitrogen) cloning vectors, in a final volume of 25  $\mu$ l. 2 x Reddy Mix™ PCR Master Mix (ABgene®) which contains Thermoprime Plus DNA polymerase (0.625 units), Tris-HCl pH 8.8 (75 mM), (NH<sub>4</sub>)<sub>2</sub>SO<sub>4</sub> (20 mM), MgCl<sub>2</sub> (1.5 mM), Tween 20 (0.01% v/v), dATP, dGTP, dTTP, dCTP (0.2 mM each) and precipitant plus red dye for electrophoresis. Primers at 0.1-1.0  $\mu$ M, additional MgCl<sub>2</sub> (0-5 mM; Sigma) and 10-100 ng genomic DNA template were also added.

Samples were centrifuged and amplified in a Programmable Thermal Controller (Hybaid Ltd, PCR Sprint). The following thermal cycling profile was run: Initial denaturation at 94 °C for 3 minutes; 10 cycles of denaturation at 94 °C (15 seconds), primer annealing at 45-55 °C (30 seconds), extension at 72 °C (1 minute per kb of DNA to be amplified - usually 45 seconds); Denaturation at 94 °C (15 seconds), primer annealing at 45-55 °C (30 seconds), extension at 72 °C (48 seconds for the first round

and an additional 3 seconds for every additional round, for a total of 20 rounds; Final extension at 72 °C (6 minutes); Cooling to 4 °C.

The PCR product was radio-labelled and used to probe the genomic DNA library. Two independent clones were isolated from the *Acetmonium strictum* genomic DNA library (KHIII4A2 and KHIII4B1) and these were sequenced outwards in both directions from the region relating to the location of the PCR product obtained with our degenerate primers (Lark Technologies). Sequencing was continued until entire PKS had been sequenced. The results of the sequencing reactions were aligned to form a contig assembly which contained at least a 500 bp overlap between fragments.

The sequence has been deposited with the EMBL database, Accession#: AM745350.

### 1.31 DNA Sequence of *ASpks1*

```

1    ATGGCAGCTC ATGGGCAAACT CTCAAAACGG GGTAAACAACA CCCTGCTGCT CTTGCGGGCC CTCGTTCAAT CACACGATGT GTCCACGTGT AGGAGTATGC
101  GTGAGTCCAT TGTAGTACAA CATGGGGAAAC ACAGCTGGTGT GGTGGACTCA ATCAAGGCCCC TACCCCAGGA CTTTGAAGCA GCCTCCACAT ATCTACCATT
201  TTTCTGACAA GCAACAACAA CGACAATTCA TCAAGTTGCT TCGATAGTCG TGTCARAGTT CTTGACCCGGA TCCTTCCGAAA GCTCTGCTCT GCCCTTGCCT
301  GCTGCCCTGC TGATTCCCTT GGGCCGTTGCC ACACAGCTCG CGCATATGT  CGAGTATTCA CGCCAGTCTC CAACTGGTFTT GGGCCGAGGGC AAAGAGGCAC
65  401  TCGGGTTTTG CACAGGCATC TTGAGTGCCT TTGCTGTGGC CAGTTTCTAT GATGTCTGTG ATTTGGCCAA GTACGGTGGC GCTGCCATGC GTCTAGGTAT
501  GCTCTGGTGG TGTGCTGGTG ACTGCGAGGA TGCAGCAGCT GCAACAGGGA GATACCGGAT TGTGAGCGCC GCGTGGGATT GCGGAGAGAA ACATGCTGCG
601  ATGCTCAAGA TTGTTCAAAG CTTTGAAGAG GTGAGCATCA TATGTCATG TCTACCTGAG TCAAAATGCA GACGACTAAT CGCATCATTT ATCTACAGGC
701  ATACGTCTCG GTGCACTTTG ACAAGAACC CGCCAACATC ACAACCAGCC CAGGGACCAT ATCCAACCTG ACCCGCCAAC TGCAAAAGA AATGCTCGTA
801  GCCTCGGACA TGGTCTCTCT CGGCCGCTTC CACTTTGGCC GAAAGCAAAA GCGCCCGCAA GTCCAGTGGG ACAGCTCTGT TAGCTTTTGC AACTCGCCAG
901  CTGGCGCACT GTTCCGACTC CCAGATGCAG ACTCACTCCG TCTGCAACAG CGTATCAATG ACAGGGATGG CCGGCTTATC ACTCAGGGTT GCTTACATGA
1001 ACACGCGCTG CAATCCATCC TGGTCAAAC TGGCGCATGG TTTGAGACCT TCTCATCCGC CACGACAACA CRAGCCAACA CGGGGGCACA GAATGGTCTGA
1101 GCTCGACCTC AAATTTGCA  CTTTGGTCCC AAAACAGCCG TTCGCACTC CCTGGCCCTC ACAGTTGACA TCAATTGAGG CAATGGCAAG ACTAGGCGAG
1201 TCAAAGCCAG AGACGCCAGC TTCTTCTGTA ATCCACCCCA TACCGCCCCC TGCTCGACA CTGATATTTC CATAGTAGGC CATAGTCCGA ATGTCTCGTA AGCTCCCTGG
1301 AGCCGAGAAC CTTGAGGAGT TCTGGGATT  GCTGTCTCT  GGCAAGTAC  AGCACAAGA  AATCTCAGGG  CAAGAAGGGG  GAGCCTTCGA  CTTGCTGTGC
1401 ACAGCTTTCC GCACTGGCCG CGACCAACGA CGTGATGGT TCGCCAACCT GGTCTCAAC  CATGATCAGT TCGATCACCG TCGATCACCG CGGCTACTTC AACAACTCCT CTCCTCAAC
1501 GTGAGAGCCG GTCCATGGAC CCTCAACAGC GGCACATACT CCAGTAGGTT TACCAGGCTG TAGAAGGAAG CCGGCTACTTC AACAACTCCT CTCCTCAAC
1601 GTCCAGCAAC GCAACAATFG GGTGTACTGT GGGGCTCTGC CACTGAGATT ACCAGTCCA GTGTGGCTTCG CATGCCGCGA CCGCTTTTAC AGCAACCGGA
1701 AACCTCAAAG GCTTCGTCTC AGGCAAAGTC TCGCACTACT TCGGGTGGAC GGGGCGCAGA GTCCAGGTCA ACACAGCTGT CAGCTCTCC  CTGTTGCGCC
1801 TGCACCTAGC CTGCCAGGCT ATCTTGTGCG GGGAGTGCGA GGCTGCGCTG GCTGGAGGTT CGCACATCAT GACGTCCGCA ACCTGGTTC  AGAACCTCCG
1901 AGGAGGGTGC TTCTGAGCC CTACAGGGGC CTGCAAGCCG TTCGACTCCA AAGCTGATGG GTACTGCCGC GTACTGCCGA GGTGAGGGTG TGGGAGCTGT TCTCTTAAAG
2001 AGGATGAGCC AGGCCATGCG CGATGTTGAT  AGGTTCTTGG  GTGTGGTGGC  CCGCAGCGGT  GTCCAGCAGA  ACCGAAACTG  CACCCTATC  TTCGTGCCCA
2101 ACGCACCTTC ATTTGGAAAC TTGTTTAGCC  GCGTCACTGC  CAAAGCACCT  GTTAAGCCAG  CAGACATCTC  GGTGTGTGAG  GGTGTGTGAG  GATCTGAGCT
2201 GGTGGGAGAC CCTGCTGAAT  ACGATGCCAT  TCGGAAAGCT  CTTGGAGGCA  CTACTCATCG  CTCAGCCGAG  AAGCCTCTTA  TCGTCAAGCT  AGTCAAAGGA
2301 CTTGTGGGCC ATATGGAGTG  CACATCAGGG  GTCATTTGTA  TGAATCAACT  CTTGTTGATG  ATGAATAAAG  GTGGCTTCG  CCGCTTTTAC  AGCAACCGGA
85  2401 GCATCAACCC GGCCTTGGGA GCGACGCCCG CGACACATC GTTATACTCT ACCCGCCCTC AGCCATGGGT GGTGCCGCGA GGGGGATTCC GAGCTGCTCT
2501 GCTCAACAC  TACGGTGTCT  CCGGGTCAAA  CGCTTCTGCA  GTCCTTGTCC  AGTCACTTTC  AATGAGCTTC  AGGCCCCGGA  TCACAGTGGC  GTCTAGGCC
2601 GCAGCCCGGA TCAAGTTTCC TTCTGGCTC  GCGGCCCTTG  ACAAGAAAAG  CTTGAGCCGT  TATGTGAAGG  CTTTGGCAG  GTGGCTGTGC  CGATTAGATG
2701 GAGATCAATC ACTCGCCAGC CTCTCGTTCA ATCTCGCAGC CCAAGCAATC CGCACAAATG AGGCCAACTG GGTCTCACT  GCGCCGCTTA  TAGAAGCACT
2801 TGATCAGAGC CTGCTGACT  TTGAGAAATG  AAATAGTGA  CTTTCTATCG  AAAGAATCTC  AGCTTCTCTC  CAGCCGACGG  TGATCTGATG  GATTTGGAGT
90  2901 CAGGTTTCA  GTTTCGTTGG  TCTTGAACA  CAAGCTATCT  AAGACATGCG  ACTTGTGCGC  TATTTATCTG  ACCGAGTTGA  TGCTGTCACT  CAGTGTCAAG
3001 GAGGCCGAG  GATCTTCCCA  GGAATTTTCA  ACCGCTCGCC  TCCATCAAAG  GTGATATATG  TGCAATCTCA  TGCAATCTCA  TGCAATCTCA  TGCAATCTCA
3101 CGCACGCTG  TGGATGCACT  CCGGTGTGAA  GCGACGCCGA  CTTGTAGGCC  ATGATTTCCG  AACCCTCACT  GCCATATGCA  TCTCGGGCAT  TCTTTCGTT
3201 GAGCATACGA TCAAGSCCAT  TATGTGCCGA  GCCAAACTTC  TCAACAGGCG  GCGCCGCCCC  AGCCAAAGGG  GCATGATTGC  AGTCAAGGG  GATGATCAAG
3301 TGATTGAAGA ACTCCTTGAT  GAAGCGAA  AGAACCCAGA  CGACAAGCCC  GCGACAATCG  CCGTACAAA  TGGCCCGAG  AGCTTACAC  TTGCTGGATC
95  3401 CACTACTGCT ATGATGCGCG TGGTGTCTCA GCTGAAAAC  GGGCCAAAT  ACAGCAAAGG  CATGAAGTCT  AAGAGGATCT  ATGTACACAA  CGCTTCCAC
3501 TCGGTTTCTG TTGACCTTTG GCTCGAGGAG CTGCGCAAAA TTCTGGAGTA  AGTTCGCGA  AACCATAAT  AACCATAAT  TCCTGTCCAG  TCTGACCACT
3601 AACACACATC GAGCGAAAT  GAGCTCACAA  GTGAGTTTAT  GGCAAAAC  ATGCGCCAGC  CTTGTGACTT  CCACACGCC  GTTGAGCGGC  TCGCACCGGC
3701 GTATGCGCGA GGCCTCTCCC CATGTGTTTT CTTTGGAGCT  TTCTGCCAAA  CATCTGTCTG  TAATATGGCA  TCTCGTCTC  TCTCGTCTC  AGATTTCCAG
3801 ACCAAGATCT CCTCCTCTCT ATTCATGGA  GTCAACATCG  CCAACTCGCA  CGCCGGATGG  AGCAAGTCA  CGCACCCAC  CCGTAAATCT  TGGGAGACAG
100  3901 GTGTAAGAGT GCACCCTGG  GCACATCACG  GTGTACAGCA  GATGACCCAG  ACAGCATCAT  GACCACTTGT  TACCCTTCTC  TACCCTTCTC  ACCCTGATTC
4001 GCGTCAATGG ATAGATCTCA AGGTTCCGG  CAAAGCTCTC  ATGGAACAG  ATGAGGCAGA  TCGCGGAGGC  AAAAAGCAGT  CGGATGCCGA  AAAGCTACCA
4101 GAGACCATCT TGACTTCCA  CAGCTCTGAC  GCTGTTGGGG  CACAGAAGCA  AGCAAGATTG  CGCGTCAACA  CAATGTAGA  AGAATAACA  CAACTTCTC
4201 GAGGACATCT GACTTGGAG  AGCCGACCCA  TCTGTCCGCG  CATCTGATGC  ATCAATCTCG  TGCTCAGGGC  CACTTCCAGC  ACTTCCAGC  AGTACAGGC
4301 ATCCAGAGCC CAGCTCCAGA TCCAAGATGT  GGTCTACAGC  TCACTCTGCT  GCTTCAATTC  GGCAATAACA  TTATGGGTGG  AGTTTACCAA  CGTTAGTTGA
105  4401 CAATGATGT  TCCAAGTAT  CAGCACTACC  ACTTGGAGCT  TTCTGCCAAA  GTGCAACAGT  ATGGTACATG  TACAGGGCAC  GAGTGTCACT  CCAAGGGCAC
4501 GGGATGCGGA AATCCGGCGT  CAACTGATGA  GCTACGAGCG  TCTCTCAAG  CATGCCCAG  GACAGACCT  TCTACAGAAC  AGCAATGCC  CACTGCGCC
4601 CATTGACAGT ATGCTGGGCA ATCAAAGTAT  CTACCGCATC  TTCTCCGAGA  TATGAAGTTA  TATGCCCAG  TATGCCCAG  TCCAGAGGAT  TCCAGAGAT
4701 GGCACAGAAA CCGCAGGACA CGTCTCCAT  CTAAGCATC  AAGACTCGC  CAGTACCAG  GCGGAGCCAT  GGTTCGACC  TCACTTGGCC  GATACTTTCT
4801 GCCAGCTCG  TGGCTTGTG  GTCAACTGCA  TGATGCCAGA  GCGGGAGCGT  GGAATGGTC  ATGTGTATCT  GGCAACGGA  ATCGATCAGT  GGATTCGCG
110  4901 TTATCCCGCG GCCAGCATC  ACCGGCCGGA  GGCTTTCAAC  GTGTTTGTG  TGAATAAGCA  GGCTCAGAG  CAGCTCACTT  TGACTGATG  TTTGTTTTT
5001 AATGCCCGCG ACGGGCTCT  TGTGGAAGTC  ATCCTCGGTA  TTGCGTATG  CAAGATCGCA  AGGCTTCAA  TGGAGAAGTT  GCTTCCCGCG  TTGACAGAG
5101 CTTCAITGGGT GGCAGGTGGA AAGACTACGC  CTCAGACTGC  TACAAAAACA  GTCGACAGC  GTCGACAGC  GGATCAACAG  GGATCAACAG  CAGAGTCAAG
5201 GTCAACAGTT AACGGGTGA  ACTTGGACGA  TAGGAAGCCT  GAAGGGACGG  CACTCCCCCA  AGAAATGTCT  TCTGATACC  AAGAGCTCAG  GCCCAAGGA
5301 CAAGGACAAG AACTCCAAAG  CATGATCGCC  CCGTGAAGAG  CCGTGTATGG  TGACATTTCC  GGCTTTGACA  TTTCCGAAAT  TTTCCGAAAT  AGCAACCTCG
115  5401 CTGACTCGG  CATCGACTCA  CTTGTTGGTA  TGGAAATGAC  GCACGAGATT  GAGTTCGACT  TGAAGGTGGA  ACTTCCCGAG  TCCGAGATTA  TGCTGTTGT
5501 TGACATGGA  GGCCTGCTC  AATGCGTAG  TGGAGCTTGT  GGACTGTGCA  TGACTGGAG  TTCAAGCGCA  ACGTTAACAG  CAACTCAGA  CAGCGGCATT
5601 AATAGTGCBA AGTCACTCAT  CCTGAGCGGT  TCTGACAGCA  CGCAACAGCA  GGTACTACA  GATACCGGAT  CTTGATGTCC  CCAGATGAT  AAAGAGCCCT
5701 CTCTCATTTG GGCACAGTA  AAGAAGCCGT  TCGCACAGAC  CAAAGAGGCA  ACAGAGCCCC  CGATTAAAGC  AGCCAGCAAC  CAACTTCCAG  ACTGCTCTAC
5801 CTCTCTCCCG CAGCAGAAAT  AGCTATCAGT  CTTGCTCACT  ATAACGCCCT  TTAAGCCCTC  GCGTGCAGGT  TCTCAGACTG  TCTCAGACTG  CTTGAGGAT
120  5901 ACACCAATCT CCGCCGCAAC  TGGACAGGAG  CAATGCTGTA  CGCACTGTTA  CAAAGAGATC  GAGACAGCAA  CCAAAATCAT  CAAAGTCCAG  GGGATGGCG
6001 CACAAGCTGT GATCAAGAAG  ACAGCTGTGC  CRTTGCAGCA  GGTGGAGAGC  CGTGTGGTGC  GCGAGTCTG  CCAGATGCTG  AGAGGCGATC  GCGAGCAAT
6101 TGGTACAATG GAGTTGATCA AACATCGAGG  CGAAGCACTT  CACCGGTTGT  TGGCGGTTGA  GACAGATGGG  GCTAAGGTA  TCTTGGTAT  CAAAATGCG
6201 TCGAAGCTGT TTAGTCAAGT  GTACGCGCAG  TGCCCACTG  ACAGCTCAT  TATGTTCCCA  ATGTTGCCAG  ATGTTGCCAG  TCCTTACTCG  TGCTGCTCGC
125  6301 CTGACGAGGA CATGCCFTTC  AGTGAATTA  ACCCCTTGG  TATCATGGAA  ACAGGAGCCG  GCACGGGGG  CACAACGAAA  CAGATCGTGC  CACTCCTAGC
6401 AGCCTTGGT  CTGCCGFTG  TGTACACTTT  CAGGACACTT  GCGGCTCTTT  TCGTGGCAGC  GCGCCGCAAG  ACCTGGGGTA  AAGAGTACC  GTGGATGAG
6501 TTTCCGAACCC TCGACATGGA  AAAGAGCCCA  CATCCGCTCG  AGGATGGCC  GCGCCGTGAG  GCGCTTCAAG  TCTCAGCCAA  CGCTGTTACC  GCGACCAAT
6601 CGATCAGCCG CAGCAGAGCC  AACCTACGCA  AGGCCGCTCG  CACAGACGCG  TTTCCCTGTA  TGAATGGAGT  GACTCGGACA  CCGTTCGCG  TAGACTTGT
6701 TTTGCGACTT TTTGAAGGCT  GGTGGTTGTT  TGAGGACGGA  AGGAAGCATG  CGCTTACGCA  TGAGCCGCTG  GTGATCAGG  TGGGATCAG  GCTTACGATA
6801 GGATATGTGG ATTTGACGGA  GGGGATGACG  CTTGAGAGTG  AGATTCAGAA  GATCATCTG  CGCTCAGCG  ACGCAAACAC  TCGTAAATG  TTTTCTCTC
6901 TTGTCTCTCA AGTATGTTGT  GGACTCAATT  ATTTTTCTAC  CTAAGACTAG  ATTTTTCTAC  CTCGAAACAG  CTCGAAACAG  TCGCCTTGGC  AGCCAGCAT  AACTTCTAC
130  7001 ATTTGAATCA AGTTGGCGTG  GAGAACAAG  CCCGAGAAT  TATGGTTGCC  GACTACGCT  CAACATTGAC  CAAGGAGTT  AACAAAGCA  TGACTCAGTA
7101 CACAGATCG  GGACTCTCCC  TTTCTAGCTG  CACACTCTAG  ACACCTATGA  ATGAGCTGATC  GTACTGATC  CTCATCAGG  GAGGCACGG  GCGCTTAGT
7201 CCCACCTGG  TAGCGGAAGC  CGCCCTCTC  CCGCAGCTCA  ATATGGTGT  ATGCTGAAAC  GACCAACAAA  AGCAAGGAA  AGCAAGGAA  AGGAGTTGG
7301 TATCCCTGGA AAAGAAAGCA  CTAATCTTGA  GTCCAGAGG  TCTGGCCAG  ATTACCCTGT  TCGAAAACG  CTTTCCAG  CCAAGTAGT  TCGTCTCTC
135  7401 GGATGACAAG TATAACCTCC  TGAGAGGTAA  GTGACGCGCA  ATCCCTGGCT  GATGCACTCC  AAATGGCCGT  TCGAAGCTCC  CCAAGGCTTT  CGAACCCGAG
    
```

7501 CTACGCATAA TGGCGCAT GTTGAACCTG GCAGCAGATA TTGCTACATG TCAACGCACC CAGGGGCAAC GTCAGCCAGG ACCACC GGCT TCCTTTGTCT  
7601 TCGTCTCCTC TATGCCACG GTAGGCTATC ATCCGGTCTG CACCAATCCA GGCAATCCTG CTGTCCAGG GACACGGATC CCCATATCTA GCGTCTTACC  
7701 GACAGGATA GGTGAGGCAA AGTACATCTG CGAGCGTATG CTGACGCGA CGCTTCATCA GTACCCGGCG CAGTTCAGAG CATCGCGCGT GCGACTGGGA  
7801 CAGATCGCAG GCAGCGAGT CAACGGCCAT TGGAACTCTG CGGAGCATAT CTGTTCTCTC GTTAAATCAT CACAGAGCAT CCGAGCCTTG CCTGCACTCC  
140 7901 CGGTCCAAAT GGGCTGGAGC CCAGCCGACT ACGTGGCTCG TGGGCTGGTA GAGATTGCGA CGCAACC GGA CAACATCGAA CTCTACCCAA TCTATCACAT  
8001 TGAGAACCCC GTCAGGCAAC CCTGGGACGA GCGCTGGCC GTTCTAGCCG ACCGAGATGGG GATATCCTCA GAGGCGCTTC CGTTCAGGA GTGGGTGCAA  
8101 ACATGCGGG ACTGGCCAGC ACAAGGGGAC AACCCCGCCG CCGGCGCAA CCGCGGTAT CTCTCTGTGG ATTTCTCTGA GGATCACTTT CTACGGATGA  
8201 GTTGTGGAGG TTTGCTACTG GGCACGGCGA AGCCGAGGGA GCATTCCTCCG AGTCTTGCTG GGATGGGCC GGTGAGCGAT GAGTTGCTTA GATTGTTTGT  
8301 TAGAAGCTGG AAGGAGTGG GTTTCTTGTG GTGA

145

### 1.32 Peptide Sequence of MOS.

1 MAAHGQTSKR GNNTLLLFGA LVQSHDVSTL RSMRESIVVQ HGEHSWLVDV  
51 IKALPQDFEA ALPHLPFFDQ ATTTTIHQLL VDAVSSFLTG SFETLVSPPLP  
101 AALLIPLAVA TQLAHYVEYS RQSPTGLAEG KEALGFCTGI LSAFAVASSH  
150 151 DVCDLAKYGA AAMRLGMLVG LVVDCEDAAA GQGRYRSVSA GWDSEEKHAH  
201 MLKIVQSFEI AYSVSHFDKN RATITTSPTG ISNLTRQLQK EGLVASDMGL  
251 LGRFHFAGST KPFEVTVQDL VSF CNSPAGA LFRLPDADSL RLATRINDRD  
301 GGLITQGS LH EHALQSILVK LAWFETFSS ATTTQANTGA QNGRARPQIV  
351 DFGPQNSVPH SLASTVDINS GNGKTRRVKP ADAQSSANST HTRPWLDTDI  
155 401 AIVGMSCKVP GAENLEEFWD LLVSGKSQHQ EISGQEGGRF DFGDTAFRTA  
451 ADQRRRWFAN LVSNHQDFH RFFKKSARES ASMDPQQRHI LQVAYQAVEG  
501 SGYFNKSSSS TPTNANIGCY VGLCLGDYES NVASHPATAF TATGNLQGFV  
551 SGKVSHYFGW TGPAVTVNTA CSSSLVAVHL ACQAILS GEC EAALAGGSHI  
601 MTSATWFQNL AGGSFSLPTG ACKPFDKAD GYCRGEGVGA VFLKRMSQAM  
160 651 ADGDMVLGVV AATGVQQNQ N CTPIFVNPAP SLENLFSRVM TKARVKNPADI  
701 SVVEGHGTGT AVGDPAEYDA IRKALGGTTH RSADKPLMLS SVKGLVGHME  
751 CTSGVIGMIK LLLMMNK GAL PPQASFQ SIN PALGATPADH MFIPTRPQPW  
801 VVPAGGFRAA LLNRYGASG NASAVLVQSP SMSFRPEITV GSRPAAGIKF  
851 PFWLAADF KK SLSRYVKALR KWLCLDGDQ SLASLSFNLA RQSNRTMQAN  
165 901 LVL TARSIEA LDQSLADFEN GNDGSFIERT PASSQPTVIL CFGGQVSCFV  
951 GLDKQVYQDM ALVRYLDRV DAVIQCGGR SIFPGIFNRS PPSKVDIVHL  
1001 HTMLFAMQYA SARCWIDSGV KPAALVGH SF GTLTALCISG ILSLEDTIKA  
1051 IMCRAKLLNE AWGPDQGGMI AVEGDIDVIE ELLDEANKNH DDKPATIACY  
1101 NGTSTFTLAG STTAMDAVA QLNKNGAKYSK GMKSRIYVT HAFHSVLVDP  
170 1151 LLEELTQRVA DSGVFRKPI IPVELSTEQH MSESELTSEF MANHMRQPVY  
1201 FHHAVERLAR RYAGGSSPCV FLEAGTNS SV CNMASRALGS TEFVTKSSSL  
1251 SFHGVNIANC DAGWNKLTDT TVNLWETGVR VHHWAHHGVQ QMHQTDIKPL  
1301 LVPPYQFDPD SRHWIDLKVP RKALMETDEA DAGGKKQSDA EKL PETILTF  
1351 HSSDAVGAQK QARFRVNTML EYKQLLRGH MTLETAPILS ATLQINLVIE  
175 1401 AISSTQPEYK SSKSQPQIQD VVYQSPVCFN SANTLWVEVT NVSGQW MFQV  
1451 FSTTTQELSP KSTRVHTKG TVAFKNPGDA EIRRLMSYE RLF SHGRATD  
1501 LLQNSNASTA PIDEMLGNQS IYRIFSEIVS YGPEFRGLQK MVS RGNETAG  
1551 HVVHLKHQDS ASTEAE PWF PHLADTFCQL GGLWVNCMMP ERERGNH VY  
1601 LANGIDQWIR GYPAASTDRP EAFNVFAVNK QASEQLTLTD VVFVNAADGA  
180 1651 LVEVILGIAY VKIARPSMEK LLARL TEP SW VAGGKTPQT ATKPAAAPVV  
1701 ADHTPRTTES ASTVNGV NLD DRKPEGTALP QEMLSDTEEL RPKAQGQELQ  
1751 DMIARVKAVM ADISGLDISE IKDDSNLADL GIDSLVGMEM THEIESTLKV  
1801 ELPESEIMSV DMEGLLQCV AGALGLSMTG ASSDTLTASS DSGINS AKSS  
1851 ILSGTSTSTS TGT TDTGSDV GQSMKEPSLM LDTVKKAF AQ TKEATDARIK  
185 1901 AASNQVSYCS TSLPQQNELS VLLTITALEA LGAGFSTARP GSQ LTRISHA  
1951 PGHEQFVTHL YKEIETATQI IKIDGHGAQA VITRTAVPLP DVESRQVALC  
2001 EQMLRGDPEQ VGTMELIKHA GENLHRVLSG ETDGAKVIFG SKTGSKLV SQ  
2051 WYAQWPLNRS LIAQMGDFLT AVVAGIQADE DMPFSEINPL RIMETGAGTG  
2101 GTTKQIVPLL ARLGLPVVYT FTDLAPS FVA AARKTWGKEY PWMQFRTLDM  
190 2151 EKT PPSVEDG LPLQH FIVSA NAVHATK SIS ATTGNLRKAL RTDGFLLMME  
2201 MTRTPFWVDL IFGLFEGWWL FEDGRKHALT HEALWDQELS KVGFGYVDWT  
2251 EGMTAESEIQ KIILASADAN TR\*WLERVRL PASHTDYHLN QVGVENEARE  
2301 LMVADYVSTL TKEFNKTMTQ YTDAGLSLSS RTSQTPMSSQ KRCILITGGT  
2351 GGLGAHLVAE AALLPDVNMV ICLNRPNRKQ EARERQLVSL EKKGLILSPE  
195 2401 ALAKITVFET DLSQPGSLGL SDDKYNLLRG NVTHIHN AW LMHSKWPVRR  
2451 FEPQLRIMAH MNLADIAT CQRTQGQRQP GPPV SFV FVS SIATVGYHPV  
2501 VTNPGNPAVP ETRNPISSVL PTGYGEAKYI CERMLDATH QYPAQFRASA  
2551 VRLGQIAGSE INGHWNSAEH ISFLVKSSQS IGALPALPGP MGWTPADYVA  
2601 RGLVEIATQP DNIELYPIYH IENPVRQPWD EALAVLADEM GISSEALPFQ  
200 2651 EWWQTVRDWP RQGDNTAAGA NPAYLLVDFL EDHFLRMSCG GLLLG TAKAR  
2701 EHSPSLAGMG PVSDELLRLF VRSWKEVGFL L

### 1.4 Cloning of *ASpks1* into pTAex3 and transformation into *A. oryzae*.

#### 205 **1.41 Cloning of PKS.**

An expression plasmid vector was constructed for *ASpks1* based upon pTAex3 and transformed into *A. oryzae* protoplasts. There were no suitable restriction sites before the start codon for *ASpks1* in the KHIII4A2 clone so the 5' end of the gene was amplified by PCR first and cloned into an entry vector. The forward primer contained the sequence CACC followed by the start codon ATG to allow cloning  
210 into pENTR-SD-D-TOPO. The reverse primer had an *EcoRI* site introduced at the 5' end to create this restriction site into the 3' end of the PCR product which resulted from its use. An *XcmI* site was located 684 bp downstream from the start of the gene, and an *EcoRI* site after the stop codon. These two restriction sites allowed the bulk of the gene (8 471 bp) to be obtained by a restriction digest with *XcmI* and *EcoRI*. This fragment was then inserted into a similarly digested vector. The gene, intact and  
215 present in the pENTR-SD-D-TOPO vector, was then recombined with a vector containing the selectable marker, promoter and terminator sequences to allow heterologous expression of the AsPKS1 sequence.

#### **1.42 Transformation into *A. oryzae*.**

220 A spore suspension (100-200  $\mu$ l) of the appropriate fungal strain was spread onto an agar plate of the appropriate rich medium. The plate was incubated at 25°C for 3-5 days. Tween 80 (0.01 %; 10 ml) was added to the agar plate and the spores scraped off with a loop. The liquid was collected and centrifuged (10 000  $\times$  g, 5 minutes), the supernatant removed and the crude spore preparation resuspended in water (1 ml). This spore suspension was used to inoculate the appropriate rich growth medium (100 ml)  
225 which was then incubated at 25 °C with shaking (240 rpm, 24-48 hours).

Mycelia were collected by filtration through sterile Miracloth, washed twice with 0.8 M sodium chloride (20 ml), centrifuged (10 000  $\times$  g, 10 minutes) and the supernatant was discarded. Filter-sterilised protoplasting solution (20 ml, 20 mg/ml Glucanase, 10 mg/ml Driselase; Interspex Products in 0.8 M NaCl) was added to the pellet and resuspended thoroughly by vortexing. The tube was  
230 incubated at room temperature, with gentle mixing on a rotator. After one hour, a small sample was analysed microscopically for protoplast formation, if the cells had not formed protoplasts yet, the incubation was continued and the cells checked again at 30 minute intervals until a sufficient proportion of protoplasts had formed.

The protoplasts were released from hyphal strands by gentle pipetting with a large wide-bore  
235 pipette (5 ml). The protoplasts were filtered through sterile Miracloth to remove the hyphae. The filtrate was centrifuged (maximum 2 000  $\times$  g, 5 minutes) just fast enough to pellet all of the protoplasts, if after centrifugation the solution was cloudy the tube was centrifuged faster and/ or longer. The protoplasts were washed twice with 0.8 M NaCl (20 ml) and once with Solution I (0.8 M NaCl, 10 mM CaCl<sub>2</sub>, 50 mM Tris-HCl pH 7.5; 20ml), each time the pellet was resuspended by using a  
240 wide-bore pipette and centrifuged (2 000  $\times$  g, 5 minutes) to remove the supernatant. The concentration of protoplasts was determined by using a haematocytometer (Fisher) and the protoplasts resuspended in Solution I to give a concentration in the range 1-9  $\times$  10<sup>7</sup> protoplasts/ ml. The protoplasts were stored on ice.

DNA (5-10  $\mu$ g, 10  $\mu$ l maximum) to be transformed into the fungus was added to the protoplast  
245 suspension (100  $\mu$ l) and incubated on ice (2 minutes). Solution II (60 % PEG 3350 (Sigma), 10 mM CaCl<sub>2</sub>, 50 mM Tris-HCl pH 7.5; 1 ml) was added dropwise over 15 minutes, then incubated at room temperature (20 minutes). Plates were poured with Czapek-Dox agar in sorbitol (1 M; 5 ml). Czapek-Dox agar in sorbitol (1 M; 5 ml) was added to the transformation mixture and overlaid onto the prepared plates. The plates were incubated at 25 °C.

250 In the case of the *Aspergillus oryzae* transformations, where selection occurs on arginine-deficient media, the plates were pre-poured with 10 ml agar and the transformed protoplasts plated in

10 ml agar. As the growth was on arginine-deficient media, any transformants were now able to grow. A positive control was made by the addition of 2 % arginine solution (200 µl per 20 ml plate) to untransformed protoplasts and agar, which was mixed and plated; the negative control consisted of untransformed protoplasts on minimal media.

### 1.5 Fermentation and extraction of 3-methylorcinaldehyde.

200µL of the spore suspensions obtained from transformants was inoculated into 100mL starch medium (Starch (20g/L) and polypeptone (10g/L) were added to 900mL of distilled water. To this solution A (50mL; sodium nitrate (40g/L), potassium chloride (40g/L), magnesium sulfate heptahydrate (10g/L), iron sulfate heptahydrate (0.2g/L)) and solution B (50ml; potassium phosphate (20g/l)) were added). The flasks were incubated at 25°C with shaking at 150rpm for 6 days.

The culture broth was acidified using 2M hydrochloric acid until the solution reached approx. pH 3.0 and was put back on the shaker for 30mins. The mycelia were ground using a hand blender and then removed by suction filtration through the filter paper and washed with distilled water. The filtrate was washed twice with ethyl acetate. The organic layer was separated from the aqueous phase in a separation funnel and dried over anhydrous magnesium sulfate. The ethyl acetate was evaporated at a reduced pressure by the rotary evaporator. The residue of this crude extract was dissolved in methanol and analysed by LC/MS.

### 1.6 Purification and characterisation of 3-methylorcinaldehyde.

Samples were analysed by HPLC-MS using a Luna 5µm C<sub>18</sub>(2) column (Phenomex, 250 × 4.6mm, 5µm). The program was: 0-5 min (10% B); 5-35 min (gradient to 75% B); 35-37 min (gradient to 90% B); 37-45 min (90% B); 45-50 min (gradient to 10% B). Solvent A: H<sub>2</sub>O + 0.1% TFA, solvent B: MeCN + 0.09% TFA. Flow rate 1mL/min, UV 280 nm. Mass data was collected using a Waters Platform II mass spectrometer with an electrospray source operating in positive ionisation mode. 3-Methylorcinaldehyde eluted at 32.36 min, with [M]H<sup>+</sup> 167 m/e.

3-Methylorcinaldehyde was purified from the crude extract using flash chromatography (30/70 ethylacetate/hexane to 100% ethylacetate). The following physiochemical data identified the *ASpksI* expression product to be 3-methylorcinaldehyde: m.p. 142-152°C (lit.,<sup>i</sup> 137-140°C). δ<sub>H</sub> (400 MHz, CDCl<sub>3</sub>) 12.65 (1H, s, 2-OH), 10.07 (1H, s, CHO), 6.20 (1H, s, 5-H), 2.50 (3H, s, 6-CH<sub>3</sub>), 2.08 (3H, s, CH<sub>3</sub>). δ<sub>C</sub> (100 MHz, CDCl<sub>3</sub>) 193.0 (CHO), 164.1 (4-C-OH), 161.0 (2-C-OH), 141.4 (1-C-CH<sub>3</sub>), 113.3 (6-C-CH<sub>3</sub>), 109.9 (4-CH), 108.9 (3-C-CH<sub>3</sub>), 17.9 (6-CH<sub>3</sub>), 6.8 (3-CH<sub>3</sub>). HRMS EI calculated ([M<sup>+</sup>] for C<sub>9</sub>H<sub>10</sub>O<sub>3</sub>) 166.0630, found 166.0630
